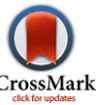

# Infrageneric Phylogeny and Temporal Divergence of *Sorghum* (Andropogoneae, Poaceae) Based on Low-Copy Nuclear and Plastid Sequences

Qing Liu<sup>1\*</sup>, Huan Liu<sup>1,2</sup>, Jun Wen<sup>3</sup>, Paul M. Peterson<sup>3\*</sup>

**1** Key Laboratory of Plant Resources Conservation and Sustainable Utilization, South China Botanical Garden, Chinese Academy of Sciences, Guangzhou, China, **2** University of Chinese Academy of Sciences, Beijing, China, **3** Department of Botany, National Museum of Natural History, Smithsonian Institution, Washington, D.C., United States of America

## Abstract

The infrageneric phylogeny and temporal divergence of *Sorghum* were explored in the present study. Sequence data of two low-copy nuclear (LCN) genes, phosphoenolpyruvate carboxylase 4 (*Pepc4*) and granule-bound starch synthase I (*GBSSI*), from 79 accessions of *Sorghum* plus *Cleistachne sorghoides* together with those from outgroups were used for maximum likelihood (ML) and Bayesian inference (BI) analyses. Bayesian dating based on three plastid DNA markers (*ndhA* intron, *rpl32-trnL*, and *rps16* intron) was used to estimate the ages of major diversification events in *Sorghum*. The monophyly of *Sorghum* plus *Cleistachne sorghoides* (with the latter nested within *Sorghum*) was strongly supported by the *Pepc4* data using BI analysis, and the monophyly of *Sorghum* was strongly supported by *GBSSI* data using both ML and BI analyses. *Sorghum* was divided into three clades in the *Pepc4*, *GBSSI*, and plastid phylograms: the subg. *Sorghum* lineage; the subg. *Parasorghum* and *Stiposorghum* lineage; and the subg. *Chaetosorghum* and *Heterosorghum* lineage. Two LCN homoeologous loci of *Cleistachne sorghoides* were first discovered in the same accession. *Sorghum arundinaceum*, *S. bicolor*, *S. x drummondii*, *S. propinquum*, and *S. virgatum* were closely related to *S. x almum* in the *Pepc4*, *GBSSI*, and plastid phylograms, suggesting that they may be potential genome donors to *S. almum*. Multiple LCN and plastid allelic variants have been identified in *S. halepense* of subg. *Sorghum*. The crown ages of *Sorghum* plus *Cleistachne sorghoides* and subg. *Sorghum* are estimated to be 12.7 million years ago (Mya) and 8.6 Mya, respectively. Molecular results support the recognition of three distinct subgenera in *Sorghum*: subg. *Chaetosorghum* with two sections, each with a single species, subg. *Parasorghum* with 17 species, and subg. *Sorghum* with nine species and we also provide a new nomenclatural combination, *Sorghum sorghoides*.

**Citation:** Liu Q, Liu H, Wen J, Peterson PM (2014) Infrageneric Phylogeny and Temporal Divergence of *Sorghum* (Andropogoneae, Poaceae) Based on Low-Copy Nuclear and Plastid Sequences. PLoS ONE 9(8): e104933. doi:10.1371/journal.pone.0104933

**Editor:** Manoj Prasad, National Institute of Plant Genome Research, India

**Received:** April 23, 2014; **Accepted:** July 12, 2014; **Published:** August 14, 2014

**Copyright:** © 2014 Liu et al. This is an open-access article distributed under the terms of the Creative Commons Attribution License, which permits unrestricted use, distribution, and reproduction in any medium, provided the original author and source are credited.

**Data Availability:** The authors confirm that all data underlying the findings are fully available without restriction. The *Pepc4*, *GBSSI*, and combined plastid matrices were submitted to TreeBASE (<http://treebase.org>, study no. TB2: S15625). The data may be accessed on the Treebase website using the identifier S15625.

**Funding:** This work was supported by the National Natural Science Foundation of China (31270275, 31310103023), the Special Basic Research Foundation of Ministry of Science and Technology of the People's Republic of China (2013FY112100), the Key Project of Key Laboratory of Plant Resources Conservation and Sustainable Utilization, South China Botanical Garden, CAS (201212ZS), the 42nd Scientific Research Foundation for the Returned Overseas Chinese Scholars, State Education Ministry (2011-1139), and the Laboratories of Analytical Biology of the National Museum of Natural History, Smithsonian Institution. The funders had no role in study design, data collection and analysis, decision to publish, or preparation of the manuscript.

**Competing Interests:** The authors have declared that no competing interests exist.

\* Email: liuqing@scib.ac.cn (QL); peterson@si.edu (PMP)

## Introduction

Cultivated sorghum [*Sorghum bicolor* (L.) Moench] ranks fifth in both production and planted area of cereal crops worldwide, only behind wheat, rice, maize, and barley [1]. *Sorghum* Moench comprises 31 species exhibiting considerable morphological and ecological diversity [2–4] in global tropical, subtropical, and warm temperate regions [5]. The genus has panicles bearing short and dense racemes of paired spikelets (one sessile, the other pedicelled), whose sessile spikelets resemble the single sessile spikelets of *Cleistachne* Benth. These two genera were assigned to Sorghinae Clayton & Renvoize [6], one of the 11 subtribes of the tribe Andropogoneae Dumort. [7]. Previous studies of the genus using chloroplast DNA (cpDNA) and nuclear ribosomal DNA (nrDNA) internal transcribed spacer (ITS) sequences indicated that

*Cleistachne* was sister to or part of an unresolved polytomy within *Sorghum* [8–10]. The ambiguous relationship between *Sorghum* and *Cleistachne* is reflected by the absence of pedicelled spikelets and the unverified hypothesis for the allotetraploid origin of *Cleistachne sorghoides* Benth. [2,11]. Within Andropogoneae, *Sorghastrum* Nash has sometimes been considered as a subgenus in *Sorghum* due to its somatic chromosome number of 40 [2], or a distinct genus whose pedicelled spikelets are reduced to vestigial pedicels [12]. Therefore, the generic limits of *Sorghum* have long been a controversial issue that needs to be tested using highly informative molecular markers.

Five morphological subgenera are recognized in *Sorghum*: *Sorghum*, *Parasorghum*, *Stiposorghum*, *Chaetosorghum*, and *Heterosorghum* [2,3,8]. Subgenus *Sorghum* contains ten species (including the cultivated sorghum) that are distributed throughout

Africa, Asia, Europe, Australia, and the Americas [2,5]. The seven species of subg. *Parasorghum* occur in Africa, Asia, and northern Australia, and the ten species of subg. *Stiposorghum* occur in northern Australia and Asia. Subgenera *Chaetosorghum* and *Heterosorghum* are native to northern Australia and the Pacific Islands [3]. Culm nodes are glabrous or slightly pubescent in three subgenera: *Sorghum*, *Chaetosorghum*, and *Heterosorghum*, and bear a ring of hairs in subg. *Parasorghum* and *Stiposorghum* [2,13]. Subgenus *Sorghum* is characterized by the presence of well-developed pedicelled spikelets, while subg. *Chaetosorghum* and *Heterosorghum* are characterized by pedicelled spikelets which are reduced to glumes [2,3].

The five morphological subgenera of *Sorghum* are not shown to be concordant with molecular phylogenetic hypothesis [14–16]. The combined ITS1/*ndhF/Adh1* sequence data support a clade of *Sorghum* plus *Cleistachne sorghoides* that is divided into two lineages, one containing subg. *Sorghum*, *Chaetosorghum* and *Heterosorghum*, as well as *Cleistachne sorghoides*, and the other, subg. *Parasorghum* and *Stiposorghum* [14]. Uncertainty about relationships in *Sorghum* has led to the reclassification of three distinct genera: *Sarga* Ewart including species of subg. *Parasorghum* and *Stiposorghum*; *Sorghum* including *S. bicolor*, *S. halepense* (L.) Pers., and *S. nitidum* (Vahl) Pers.; and *Vacoparis* Spangler including species of subg. *Chaetosorghum* and *Heterosorghum* [15]. Ng'uni et al. [16] argued that this reclassification was unwarranted. Based on plastid and ITS sequence data, they found that *Sorghum* consisted of two lineages: one lineage containing species of subg. *Sorghum*, *Chaetosorghum* and *Heterosorghum*, and a second lineage containing species of subg. *Parasorghum* and *Stiposorghum*. More than 80% of samples were confined to Australia in previous molecular studies, which focused on resolving interspecific relationships in subg. *Sorghum*. Therefore, the molecular analysis based on a greater sampling of taxa throughout their geographic ranges is essential to explore the infrageneric relationships in *Sorghum*.

The species of *Sorghum* are an excellent group for understanding the evolutionary patterns in crop species and wild relatives since the genus contains a large tertiary gene pool (GP-3, a genetic entity developed by Harlan and De Wet [17] to deal with varying levels of interfertility among related taxa), and a relatively small secondary gene pool (GP-2) [9]. Members of primary gene pool (GP-1) from the same species (such as the cereal species) can interbreed freely. Members of GP-2 are closely related to members of GP-1, although there are some hybridization barriers between members of GP-1 and GP-2, which can occasionally produce fertile first-generation (F1) hybrids. Members of GP-3 are more distantly related to members of GP-1, while gene transfers between members of GP-1 and GP-3 are impossible without artificial disturbance measures [17]. Members of subg. *Sorghum* are found in GP-2, except for *S. bicolor*, which belongs to GP-1, while species of the other four subgenera are found in GP-3 [18]. Subgenus *Sorghum* is traditionally treated as two complexes: the *Arundinacea* complex, consisting of annual non-rhizomatous species such as *S. arundinaceum* (Desv.) Stapf, *S. bicolor*, *S. x drummondii* (Nees ex Steud.) Millsp. & Chase, and *S. virgatum* (Hack.) Stapf; and the *Halepensis* complex, consisting of perennial rhizomatous species such as *S. alimum* Parodi, *S. halepense* (L.) Pers., *S. miliaceum* (Roxb.) Snowden, and *S. propinquum* (Kunth) Hitchc. [19]. Members of GP-3 contain wild genetic resources of important agronomic traits, e.g., drought tolerance and disease resistance. Nevertheless, the studies of interspecific relationships among GP-3 species has lagged behind due to small sampling, so a detailed understanding of relationships among GP-3 species is conducive for the exploitation of these valuable agronomic traits.

To date, 21.8% of grass species have been documented to have arisen as a result of hybridization events [20,21]. Plastid genes are commonly employed in phylogenetic reconstructions because they exist in high copy numbers in plant genomes and sequencing them often does not require cloning steps, and they are uniparentally (in most cases, maternally) inherited in angiosperms [22]. Low-copy nuclear (LCN) genes harbor the genetic information of bi-parental inheritance and often provide critical phylogenetic information for tracking evolution of plant lineages involving hybridization and allopolyploidization [23,24]. For these reasons, LCN gene data complementing plastid gene data are more effective in identifying allopolyploids and their genome donors. Several studies using this method have successfully resolved the backbone phylogenetic patterns of economically important crop genera, e.g., *Eleusine* Gaertn. [25], *Gossypium* L. [26], and *Hordeum* L. [27].

The middle Miocene-Pliocene interval of 1.8–17.6 million years ago (Mya) was a crucial period in the diversification of Poaceae [28]. The C<sub>4</sub> clades within the subfamily Panicoideae originated in the middle Miocene (ca. 14.0 Mya) in global tropical and subtropical regions. Subsequently, the ecological expansion of C<sub>4</sub> Panicoideae became associated with climate aridification and cooling through the late Miocene-Pliocene boundary (3.0–8.0 Mya) [29,30]. *Sorghum*, documented as an ecologically dominant member during the C<sub>4</sub> grassland expansion [28], is characterized by its modern geographic distribution spanning five continents [5,6,31]. Therefore, its ecological abundance in the late Tertiary, coupled with its wide geographic distribution in modern times, implies that *Sorghum* may have established conservative ecological traits during the early diversification process, i.e., *Sorghum* is a niche-conservative C<sub>4</sub> genus [32,33]. However, the paucity of accurate age estimations of major diversification events in *Sorghum* has impeded our understanding of whether temporal relationships existed between the diversification of *Sorghum* and palaeoclimatic fluctuations during the middle Miocene-Pliocene interval. Our study will shed some light on the impact of palaeoclimatic fluctuations on the diversification of niche-conservative C<sub>4</sub> grasses.

Here we explore the infrageneric phylogeny and temporal divergence of *Sorghum* by employing sequence data from two LCN and three plastid genes. The study aims to: (1) reconstruct infrageneric phylogenetic relationships in *Sorghum*; (2) investigate interspecific phylogenetic relationships among GP-3 species; and (3) estimate divergence times of major lineages in order to understand the impact of palaeoclimatic fluctuations on the diversification of *Sorghum*.

## Materials and Methods

### Plant Sampling and Sequencing

We sampled 79 accessions of 28 species in *Sorghum* [34–40], covering the morphological diversity and the geographic ranges of five subgenera (Table 1), plus the monotypic genus *Cleistachne*, together with seven species in six allied genera as outgroups [41,42]. Seeds were obtained from International Livestock Research Institute (ILRI), International Crops Research Institute for the Semi-Arid Tropics (IS), and United States Department of Agriculture (USDA). Leaf material was obtained from seedlings and dry herbarium specimens deposited at CANB, IBSC, K, and US (Table S1 [2,43–46]).

Two LCN genes, phosphoenolpyruvate carboxylase 4 (*Pepc4*) and granule-bound starch synthase I (*GBSSI*), were chosen for this study. The housekeeping *Pepc4* gene encodes PEPC enzyme responsible for the preliminary carbon assimilation in C<sub>4</sub> photosynthesis [47], whereas *GBSSI* gene encodes *GBSSI* enzyme

**Table 1.** Species of *Sorghum* included in the study. Chromosome numbers are based on the literature review.

| Subgenus             | Species                                                                | Longevity | Distribution                                | 2n              | References for Chromosome number |
|----------------------|------------------------------------------------------------------------|-----------|---------------------------------------------|-----------------|----------------------------------|
| <i>Sorghum</i>       |                                                                        |           |                                             |                 |                                  |
|                      | <i>S. alnum</i> Parodi                                                 | Perennial | Americas, Australia, Asia                   | 40              | [34,35]                          |
|                      | <i>S. arundinaceum</i> (Desv.) Stapf                                   | Annual    | Africa, Asia, Australia, America            | 20              | [11]                             |
|                      | <i>S. bicolor</i> (L.) Moench                                          | Annual    | Africa, Europe, Asia,<br>Australia, America | 20              | [16,36]                          |
|                      | <i>S. x drummondii</i> (Nees ex Steud.)<br>Mills. & Chase              | Annual    | Africa, Asia, Australia, America            | 20              | [11]                             |
|                      | <i>S. halepense</i> (L.) Pers.                                         | Perennial | Mediterranean, Africa,<br>Asia, Australia   | 40              | [16,37]                          |
|                      | <i>S. miliaceum</i> (Roxb.) Snowden                                    | Perennial | Asia, Africa, Australia                     | 20              | [38]                             |
|                      | <i>S. propinquum</i> (Kunth) Hitchc.                                   | Perennial | Asia                                        | 20              | [16]                             |
|                      | <i>S. sudanense</i> (Piper) Stapf                                      | Annual    | Africa, Asia, America, Europe               | 20              | [39]                             |
|                      | <i>S. virgatum</i> (Hack.) Stapf                                       | Annual    | Africa, Asia                                | 20              | [34,40]                          |
| <i>Parasorghum</i>   |                                                                        |           |                                             |                 |                                  |
|                      | <i>S. grande</i> Lazarides                                             | Perennial | Australia                                   | 30/40           | [3]                              |
|                      | <i>S. leiocladum</i> (Hack.) C.E. Hubb.                                | Perennial | Australia                                   | 20              | [2,3,16]                         |
|                      | <i>S. matarankense</i> E.D. Garber & L.A. Snyder                       | Annual    | Australia                                   | 10              | [3,16]                           |
|                      | <i>S. nitidum</i> (Vahl) Pers.                                         | Perennial | Asia, Australia                             | 20/rarely<br>10 | [2,3,16]                         |
|                      | <i>S. purpureosericeum</i> (Hochst. ex A. Rich.)<br>Asch. & Schweinf.  | Annual    | Africa, Asia                                | 10              | [2,16]                           |
|                      | <i>S. timorense</i> (Kunth) Büse                                       | Annual    | Australia                                   | 10/rarely<br>20 | [2,3,16]                         |
|                      | <i>S. versicolor</i> Andersson                                         | Annual    | Africa, Asia                                | 10              | [16]                             |
| <i>Stiposorghum</i>  |                                                                        |           |                                             |                 |                                  |
|                      | <i>S. amplum</i> Lazarides                                             | Annual    | Africa, Australia                           | 10/30           | [3,36]                           |
|                      | <i>S. angustum</i> S.T. Blake                                          | Annual    | Australia                                   | 10              | [3,16,36]                        |
|                      | <i>S. brachypodium</i> Lazarides                                       | Annual    | Australia                                   | 10              | [3,16]                           |
|                      | <i>S. bulbosum</i> Lazarides                                           | Annual    | Australia                                   | 10              | [3]                              |
|                      | <i>S. ecarinatum</i> Lazarides                                         | Annual    | Australia                                   | 10              | [3,16]                           |
|                      | <i>S. exstans</i> Lazarides                                            | Annual    | Australia                                   | 10              | [3,16]                           |
|                      | <i>S. interjectum</i> Lazarides                                        | Perennial | Australia                                   | 30              | [3,16]                           |
|                      | <i>S. intrans</i> F. Muell. ex Benth.                                  | Annual    | Australia                                   | 10              | [2,3,16]                         |
|                      | <i>S. plumosum</i> (R.Br.) P. Beauv.                                   | Perennial | Asia, Australia                             | 10/20/30        | [2,3]                            |
|                      | <i>S. stipoideum</i> (Ewart & Jean White)<br>C.A. Gardner & C.E. Hubb. | Annual    | Australia                                   | 10              | [3,16]                           |
| <i>Chaetosorghum</i> |                                                                        |           |                                             |                 |                                  |
|                      | <i>S. macrospermum</i> E.D. Garber                                     | Annual    | Australia                                   | 40              | [2,3]                            |
| <i>Heterosorghum</i> |                                                                        |           |                                             |                 |                                  |
|                      | <i>S. laxiflorum</i> F.M. Bailey                                       | Annual    | Australia, Asia                             | 40              | [2,3]                            |

doi:10.1371/journal.pone.0104933.t001

for amylose synthesis in plants and prokaryotes [48]. These two LCN genes have been used for accurate phylogenetic assessments in Poaceae [49,50]. They are predominantly low-copy in Poaceae, making it possible to establish orthology and track homoeologues arising by allopolyploidy [25,51]. Based on genome-wide researches on cereal crops, these two LCN genes appear to be on different chromosomes [48,52], thus each of the LCN markers can provide an independent phylogenetic estimation.

Genomic DNA extraction by means of DNeasy Plant Mini Kit (Qiagen, Valencia, CA, USA) was undertaken in accordance with

the manufacturer's instructions. Two LCN markers were amplified using primers and protocols listed in Table 2 [53,54]. PCR products were purified by the PEG method [55]. Cycle sequencing reactions were conducted in 10  $\mu$ L volumes containing 0.25  $\mu$ L of BigDye v.3.1, 0.5  $\mu$ L of primer, 1.75  $\mu$ L of sequencing buffer (5 $\times$ ) and 1.0  $\mu$ L of purified PCR product. For accessions that failed direct sequencing, the purified PCR products were cloned into pCR4-TOPO vectors and transformed into *Escherichia coli* TOP10 competent cells following the protocol of TOPO TA Cloning Kit (Invitrogen, Carlsbad, CA, USA). Transformed cells

were plated and grown for 16 h on LB agar with X-Gal (Promega, Madison, WI, USA) and ampicillin (Sigma, St. Louis, MO, USA). We started with fewer colonies and picked more to ensure results, and eight to 24 colonies were selected from each individual via blue-white screening in order to assess allelic sequences and PCR errors [56,57]. Inserts were sequenced with primers T7 and T3 on the ABI PRISM 3730XL DNA Analyzer (Applied Biosystems, Forster City, CA, USA).

Cloned sequences of nuclear loci were initially aligned with MUSCLE v.3.8.31 [58] and adjusted in Se-AL v.2.0a11 (<http://tree.bio.ed.ac.uk/software/seal/>). Subsequently, the corrected clones were assembled into individual-specific alignments that were analyzed separately using a maximum parsimony optimality criterion with the default parsimony settings in PAUP\* v.4.0b10 [59]. The resulting trees were used to determine unique alleles present in each individual [56]. Alleles were recognized when one or more clones from a given individual were united by one or more characters [60]. After identifying all sequence clones for a given allele, the sequences were combined in a single project in Sequencher v.5.2.3 (Gene Codes Corp., Ann Arbor, Michigan, USA) and manually edited using a “majority-rule” criterion to form a final consensus allele sequence, and instances of PCR errors [56,57] were easily identified and never occurred in more than one sequence. Newly obtained consensus sequences of 62 *Pepc4* alleles and 76 *GBSSI* alleles were submitted to GenBank (<http://ncbi.nlm.nih.gov/genbank>; Table S1).

Three plastid markers (*ndhA* intron, *rpl32-trnL*, and *rps16* intron) were amplified and sequenced to estimate lineage ages in *Sorghum*. Primer sequences and amplification protocols for the plastid markers were listed in Table 2. PCR products were purified by the PEG method [55]. Cycle sequencing reactions were conducted in 10  $\mu$ L volume and were run on an ABI PRISM 3730XL DNA Analyzer. Both strands were assembled in Sequencher v.5.2.3. Sequence alignment was initially performed using MUSCLE v.3.8.31 [58] in the multiple alignment routine

followed by manual adjustment in Se-AL v.2.0a11. The *Pepc4*, *GBSSI*, and combined plastid matrices were submitted to TreeBASE (<http://purl.org/phylo/treebase/phylogs/study/TB2:S15625>).

### Phylogenetic analyses

Each data set was analyzed with maximum likelihood (ML) using GARLI v.0.96 [61], and Bayesian inference (BI) using MrBayes v.3.2.1 [62]. The substitution model for different data partitions was determined by the Akaike Information Criterion (AIC) implemented in Modeltest v.3.7 [63], and the best-fit model for each data set was listed in Table 3. ML topology was estimated using the best-fit model, and ML bootstrap support (MLBS) of internal nodes was determined by 1000 bootstrap replicates in GARLI v.0.96 with runs set for an unlimited number of generations, and automatic termination following 10,000 generations without a significant topology change (lnL increase of 0.01). The output file containing the best trees for bootstrap reweighted data was then read into PAUP\* v.4.0b10 [59] where the majority-rule consensus tree was constructed to calculate bootstrap support values.

Bayesian inference (BI) analyses were conducted in MrBayes v.3.2.1 [62] using the best-fit model for *Pepc4* and *GBSSI* loci (Table 3). Each analysis consisted of two independent runs for 40 million generations; trees were sampled every 1000 generations, and the first 25% were discarded as burn-in. The majority-rule (50%) consensus trees were constructed after conservative exclusion of the first 10 million generations from each run as the burn-in, and the pooled trees (c. 60,000) were used to calculate the Bayesian posterior probabilities (PP) for internal nodes using the “sumt” command. The AWTY (Are We There Yet?) approach was used to explore the convergence of paired MCMC runs in BI analysis [64]. The stationarity of two runs was inspected by cumulative plots displaying the posterior probabilities of splits at selected increments over an MCMC run, and the convergence was

**Table 2.** Primer sequences and PCR protocols in the study.

| Region              | Location      | Primers                            | Sequence (5'–3')                  | PCR parameters                                                                                                 | Reference  |
|---------------------|---------------|------------------------------------|-----------------------------------|----------------------------------------------------------------------------------------------------------------|------------|
| <i>Pepc4</i>        | Chromosome 10 | <i>Pepc4</i> -8F                   | GAT CGA CGC CAT CAC CAC           | 95°C/3 min; 16×(94°C/20 s; 65°C/40 s, –1°C/cycle; 72°C/90 s), 21×(94°C/20 s; 50°C/40 s; 72°C/90 s); 72°C/5 min | This study |
|                     |               | <i>Pepc4</i> -10R                  | GGA AGT TCT TGA TGT CCT<br>TGT CG |                                                                                                                | This study |
| <i>GBSSI</i>        | Chromosome 7  | <i>waxy</i> -8F                    | ATC GTC AAC GGC ATG GAC<br>GT     | 95°C/3 min; 16×(94°C/20 s; 65°C/40 s, –1°C/cycle; 72°C/90 s), 21×(94°C/20 s; 50°C/40 s; 72°C/90 s); 72°C/5 min | This study |
|                     |               | <i>waxy</i> -13R                   | GTT CTC CCA GTT CTT GGC<br>AGG    |                                                                                                                | This study |
| <i>ndhA</i> intron  | Plastid       | <i>ndhA</i> intron-1F              | GCT GAC GCC AAA GAT TCC<br>AC     | 95°C/3 min; 37×(94°C/40 sec; 51°C/40 S; 72°C/100 sec); 72°C/10 min                                             | This study |
|                     |               | <i>ndhA</i> intron-1R              | GTA CTA GCA ATA TCT CTA<br>CG     |                                                                                                                | This study |
| <i>rpl32-trnL</i>   | Plastid       | <i>rpl32</i> -F                    | CAGT TCC AAA AAA ACG TAC<br>TTC   | The same as above                                                                                              | [53]       |
|                     |               | <i>rpl32-trnL</i> <sup>(UAG)</sup> | CTG CTT CCT AAG AGC AGC<br>GT     |                                                                                                                | [53]       |
| <i>rps16</i> intron | Plastid       | <i>rps16</i> -F2                   | AAA CGA TGT GGT AGA AAG<br>CAA C  | The same as above                                                                                              | [54]       |
|                     |               | <i>rps16</i> -R2                   | ACA TCA ATT GCA ACG ATT<br>CGA TA |                                                                                                                | [54]       |

doi:10.1371/journal.pone.0104933.t002

**Table 3.** Sequence and tree statistics for LCN and plastid genes used in this study.

| Region              | N  | Average sequence length | Aligned sequence length (SL) | GCC%   | VC  | PIC | PIC/SL | Ti/Tv  | Model   |
|---------------------|----|-------------------------|------------------------------|--------|-----|-----|--------|--------|---------|
| <i>Pepc4</i>        | 62 | 1056                    | 1225                         | 62.81% | 415 | 249 | 20.3%  | 0.7428 | GTR+I+G |
| <i>GBSSI</i>        | 76 | 1130                    | 1501                         | 54.66% | 899 | 658 | 43.8%  | 0.7819 | TIM+G   |
| <i>ndhA</i> intron  | 62 | 1041                    | 1131                         | 33.30% | 123 | 36  | 3.2%   | 1.1150 | TVM+G   |
| <i>rpl32-trnL</i>   | 62 | 730                     | 807                          | 28.45% | 106 | 48  | 5.9%   | 0.6217 | HKY+G   |
| <i>rps16</i> intron | 62 | 872                     | 920                          | 34.26% | 98  | 29  | 3.2%   | 0.4432 | F81+I+G |
| Combined plastid    | 62 | 2223                    | 2858                         | 32.28% | 327 | 113 | 4.0%   | 0.6870 | TVM+I+G |

GC = guanine and cytosine; N = number of sequences; VC = variable characters; PIC = parsimony informative characters; Ti/Tv = transition/transversion ratio. doi:10.1371/journal.pone.0104933.t003

visualized by comparative plots displaying posterior probabilities of all splits for paired MCMC runs.

The nuclear data were used to help determine bi-parental contributions, and multiple alleles were present for most polyploid taxa. Thus, the nuclear data cannot be combined with the plastid dataset, which provided the maternal phylogenetic framework. We rooted the *Pepc4* tree using species of *Apluda*, *Bothriochloa*, *Chrysopogon*, *Dichanthium* and *Sorghastrum* as outgroups and rooted the *GBSSI* tree using species of *Bothriochloa*, *Dichanthium*, *Microstegium* and *Sorghastrum* as outgroups [41,42] because clean *GBSSI* sequences of *Apluda* and *Chrysopogon* could not be isolated in the laboratory. The appropriate choice of outgroups was confirmed by phylogenetic proximity (the monophyletic ingroup being supported), genetic proximity (short branch length being observed) and base compositional similarity (ingroup-like GC%; Table 3) [65].

### Molecular Dating

For molecular dating analyses using the plastid markers, a strict molecular clock model was rejected at a significance level of 0.05 (IL = 686.7024, d.f. = 60,  $P = 0.025$ ) based on a likelihood ratio test [66]. A Bayesian relaxed clock model was implemented in BEAST v.1.7.4 [67] to estimate lineage ages in *Sorghum*. Three plastid markers were partitioned using BEAUti v.1.7.4 (within BEAST) with the best-fit model determined by Modeltest v.3.7 (Table 3).

The Andropogoneae crown age was estimated at  $17.1 \pm 4.1$  Mya [49] and within this confidence interval [68], although the most reliable fossils of subfamily Panicoideae were the petrified vegetative parts from the Richardo Formation in California [69] now dated to be approximately 12.5 Mya [70–72]. Because the lineages may have occurred earlier than the fossil record [73], the *Sorghum* stem age was set as a normal prior distribution (mean 17.1, SD 4.1). A Yule prior (Speciation: Yule Process) was employed. An uncorrelated lognormal distributed relaxed clock model was used, which permitted evolutionary rates to vary along branches according to lognormal distribution. Following optimal operator adjustment, as suggested by output diagnostics from preliminary BEAST runs, two independent MCMC runs were performed with 40 million generations, each run sampling every 1000 generations with the 25% of the samples discarded as burn-in. All parameters had a potential scale reduction factor [74] that was close to one, indicating that the posterior distribution had been adequately sampled. The convergence between two runs was checked using the “cumulative” and “compare” functions implemented in the AWTY [64]. A 50% majority rule consensus from the retained posterior trees (c. 60,000) of three runs were obtained using TreeAnnotator v.1.7.4 (within BEAST) with a PP limit of 0.5 and mean lineage heights.

## Results

### Phylogenetic analyses of *Pepc4* sequences

The aligned *Pepc4* matrix comprised 1225 characters, including partial exons 8 and 9, complete intron 9, at lengths of 841 bp, 190 bp, and 194 bp, respectively (Table 3). The *Pepc4* data provided a relatively high proportion of parsimony-informative characters (249 bp; 20.3%). The log likelihood scores of 56 substitution models ranged from 5883.8525 to 6165.2119, and Modeltest indicated that the best-fit model under AIC was GTR+I+G with base frequencies ( $\pi_A = 0.19$ ,  $\pi_C = 0.32$ ,  $\pi_G = 0.31$ , and  $\pi_T = 0.18$ ), and substitution rates ( $r_{AC} = 1.7$ ,  $r_{AG} = 2.6$ ,  $r_{AT} = 2.8$ ,  $r_{CG} = 2.3$ ,  $r_{CT} = 3.6$ , and  $r_{GT} = 1$ ). Within the Bayesian phylogenetic inference, two chains converged at similar topologies. The

standard deviation of split frequencies reached values lower than 0.01 during analysis, and the stationarity was reached after 2.27 million generations (Figure S1). The ML and the BI analyses indicated an identical phylogenetic pattern for *Sorghum* plus *Cleistachne sorghoides*.

The monophyly of *Sorghum* plus *Cleistachne sorghoides* (with the latter nested within *Sorghum*) received strong support from the BI analysis (PP = 0.99). Three clades (designated as clades P-I, P-II, and P-III) were observed in the *Pepc4* phylogram with strong support (Figure 1). The *Pepc4* sequences from one accession of *Cleistachne sorghoides* fell into two divergent lineages [clade P-I and an independent branch with strong support (MLBP = 100%, PP = 1.00)], with clade P-I having A type sequence and the independent branch having B type sequences (putative homoeologues, a potential result caused by allotetraploidy, where each sequence type represents a different parental lineage). Clade P-I contained species of subg. *Sorghum*, *S. ecarinatum* Lazarides, and A-type sequence of *Cleistachne sorghoides* with strong support (MLBP = 100%, PP = 1.00). Clade P-II comprised subg. *Parasorghum* and *Stiposorghum* with strong or moderate support (MLBP = 88%, PP = 1.00). Clade P-III contained *S. laxiflorum* with strong support (MLBP = 95%, PP = 0.99). Clade P-I was sister to clade P-III (PP = 0.94), while clade P-II was sister to B-type sequences of *C. sorghoides* (PP = 0.58), and finally, the clade P-I+clade P-III was sister to the clade P-II and B-type sequences of *C. sorghoides* in the *Pepc4* phylogram (PP = 0.99) (Figure 1).

### Phylogenetic analyses of *GBSSI* sequences

The aligned *GBSSI* matrix comprised 1501 characters, including partial exons 8 and 13, complete exons 9, 10, 11, and 12, introns 8, 9, 10, 11, and 12 at a length of 82 bp, 33 bp, 185 bp, 204 bp, 106 bp, 138 bp, 158 bp, 152 bp, 145 bp, 130 bp, and 168 bp, respectively (Table 3). The log likelihood scores of 56 substitution models ranged from 11947.3877 to 12361.0693, and Modeltest indicates that the best-fit model under AIC is TIM+G with base frequencies ( $\pi_A = 0.23$ ,  $\pi_C = 0.26$ ,  $\pi_G = 0.28$ , and  $\pi_T = 0.23$ ) and substitution rates ( $r_{AC} = 1.0$ ,  $r_{AG} = 1.5$ ,  $r_{AT} = 1.1$ ,  $r_{CG} = 1.1$ ,  $r_{CT} = 1.9$ , and  $r_{GT} = 1$ ). Within the Bayesian phylogenetic inference, two chains converged at similar topologies. The standard deviation of split frequencies reached values lower than 0.01 during analysis, and stationarity was reached after 1.09 million generations (Figure S2). The ML and the BI analyses generated an identical phylogenetic pattern for *Sorghum*.

The monophyly of *Sorghum* received strong support (MLBS = 100%, PP = 1.00) (Figure 2). Three clades (designated as clades G-I, G-II, and G-III) were recognized in the *GBSSI* phylogram with strong support. Clade G-I contained subg. *Sorghum* species, *S. leiocladum* (Hack.) C.E. Hubb., and *S. versicolor* Andersson with strong support (MLBP = 100%, PP = 1.00). Clade G-II comprised species of subg. *Parasorghum* and *Stiposorghum* with strong support (MLBP = 100%, PP = 1.00). Clade G-III consisted of *S. laxiflorum* and *S. macrospermum* with strong support (MLBP = 100%, PP = 1.00). Clade G-I was shown to be sister to clade G-II with weak support (MLBS = 0.61, PP = 0.71), and this group in turn, showed a strong association with clade G-III (MLBP = 100%, PP = 1.00) in the *GBSSI* phylogram (Figure 2).

Two (A- and B-type) homoeologous loci of *GBSSI* sequences were identified for two accessions of *Cleistachne sorghoides*, providing strong evidence for the presence of two divergent genomes. The A-type *GBSSI* sequences of *Cleistachne sorghoides* were characterized by three features: a large number of variations occurred in introns 8, 9, 11, and 12 (e.g., the strong support for A-type homoeologues of *C. sorghoides* and *Sorghastrum nutans* in

Figure 1); the A-type homoeologues of *C. sorghoides* being distantly related to B-type homoeologues of *C. sorghoides* (Figure 2); and 13 insertions (3–17 bp in length) distributed in introns 8, 9, 11, and 12, implying the likelihood of sequence divergence after the speciation event of *C. sorghoides*.

### Divergence times

The combined plastid matrix of 62 accessions comprised 2858 characters, of which 113 were parsimony-informative (4.0%). The “cumulative” and “compare” results implemented in the AWTY showed that two runs had reached stationarity after 2.57 million generations (Figure S3). The BEAST analysis generated a well-supported tree (MLBP = 90%, PP = 0.99) for *Sorghum* plus *Cleistachne sorghoides* (Figure 3), which was identical to the topologies from ML and BI analyses. Three clades were recognized for *Sorghum* plus *Cleistachne sorghoides*. Clade II included *Cleistachne sorghoides* and subg. *Parasorghum* and *Stiposorghum* (lineage number 2), and clade I (i.e., subg. *Sorghum*) (lineage number 3) was sister to clade III (i.e., subg. *Chaetosorghum* and *Heterosorghum*). Here we discuss divergence times for the lineages of interest as shown in Table 4.

The uncorrelated-rates relaxed molecular clock suggests that the diversification of *Sorghum* plus *Cleistachne sorghoides* lineage occurred in the middle Miocene (12.7 Mya with 95% HPD of 5.5–16.7 Mya; lineage number 1 in Figure 3), which is the stem age for clade II (lineage number 2) and for clades I and III (lineage number 3). The crown age of clade II excluding *S. grande* was determined to be 10.5 (4.1–13.8) Mya in the late Miocene (lineage number 4), which is also the divergence time of clade II excluding *S. grande* and *Cleistachne sorghoides* (lineage number 5). The crown age of clade I was 10.5 (4.1–14.1) Mya in the late Miocene (lineage number 6), which is also the stem divergence time of clade III (lineage number 7) in Figure 3. Two lineages containing *S. bicolor* were estimated at 3.9 (0.3–4.3) Mya in the early Pliocene (the Africa-America-Asia-Europe lineage; lineage number 8) and 2.4 (0.0–3.4) Mya in the early Pliocene (the Africa-Asia lineage; lineage number 9), respectively (Table 4).

## Discussion

### Origin of *Cleistachne sorghoides*

Plastid, *Pepc4* and *GBSSI* data support the hypothesis for the allotetraploid origin of *Cleistachne sorghoides*. Based on the plastid data, *Cleistachne sorghoides* shared a common ancestor with clade II excluding *S. grande* (lineage number 4 in Figure 3), which may represent a source of the maternal parent for *C. sorghoides*. The plastid sequence similarity between *C. sorghoides* and clade II excluding *S. grande* also indicated that *C. sorghoides* became separated from the common ancestor in a relatively ancient time [10]. The *Pepc4* data provide evidence for this ancient allopolyploid origin because the conservative *Pepc4* gene evolved more slowly than non-housekeeping genes [75]. Two *Pepc4* homoeologous loci of *C. sorghoides* were isolated from the same accession, and this indicates the presence of two divergent genomes in *C. sorghoides*. The maternal lineage identified by the plastid tree was confirmed by the weak relationship between clade P-II and B-type homoeologues of *C. sorghoides* in the *Pepc4* phylogeny (Figure 1). The *GBSSI* tree was found to be complementary to the nrDNA ITS tree, in which *C. sorghoides* was deeply nested within the subg. *Parasorghum* and *Stiposorghum* lineage [8]. The authors inferred that the ITS sequences of *C. sorghoides* might have undergone complete homogenization towards the maternal parent, i.e. the subg. *Parasorghum* and *Stiposorghum* lineage. The B-type homoeologues of *Cleistachne sorghoides* showed no close relation-

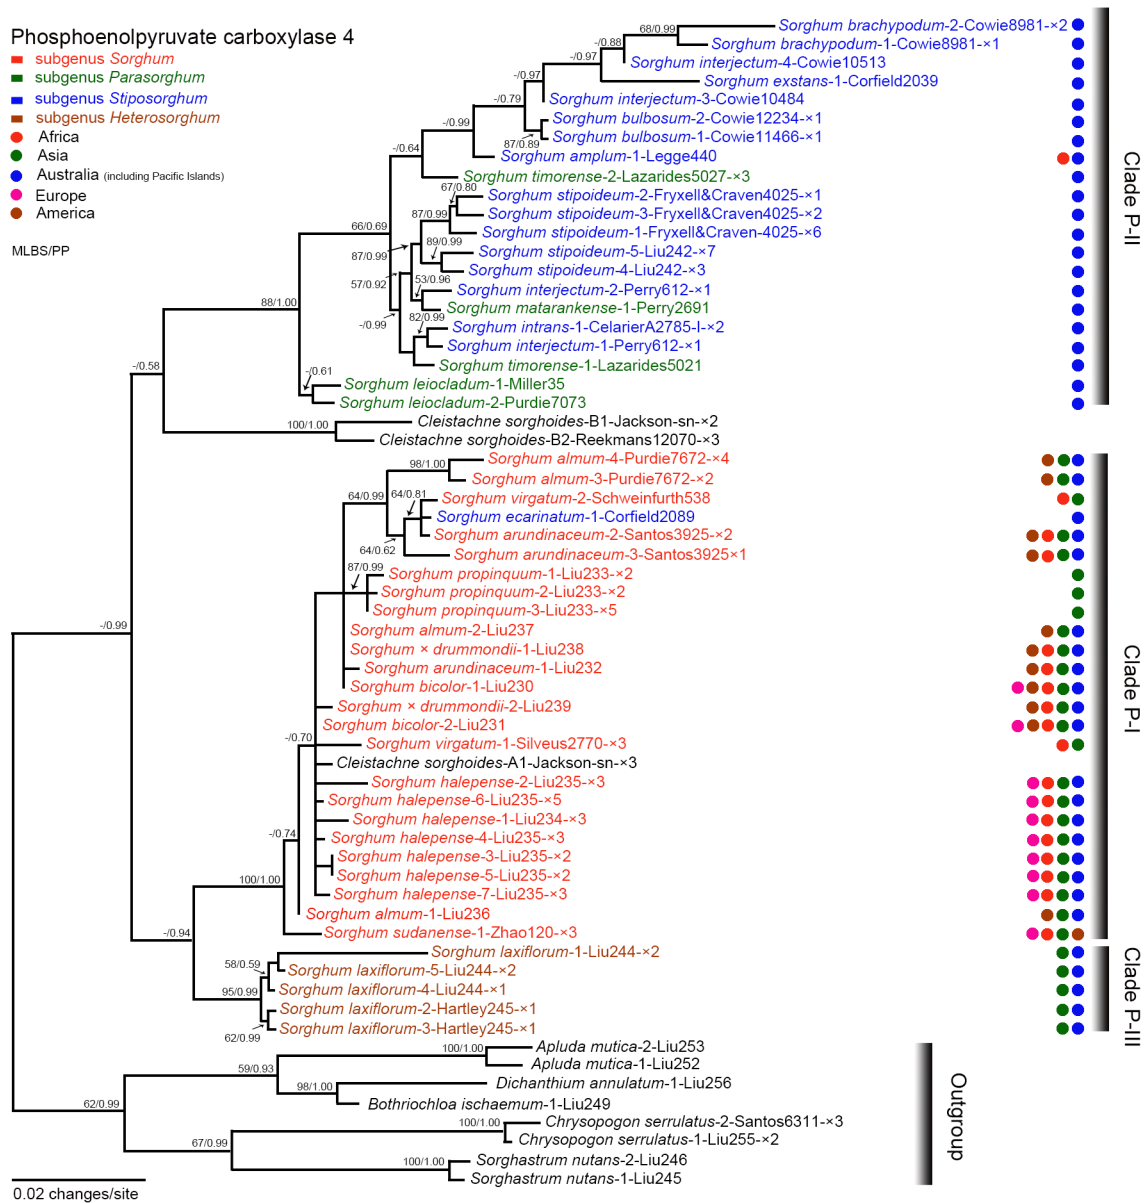

**Figure 1. Maximum likelihood phylogeny of *Sorghum* inferred from nuclear *Ppc4* data.** Numbers above branches are maximum likelihood bootstrap/Bayesian posterior probability (MLBS/PP). Taxon labels are in the format: *Sorghum brachypodum*-2-Cowie8981- $\times$ 2 where *Sorghum brachypodum* indicates that the sequence belongs to the species *Sorghum brachypodum*; -2 = the second sequence listed in Table S1 for the species; Cowie8981 = specimen voucher information; - $\times$ 2 indicates we recovered 2 clones for the sequence; and without any mark after specimen voucher information indicates the sequence is derived from PCR-direct sequencing. Coloured taxon labels and circles correspond to the listed subgenera and geographic ranges at the top left corner of the figure, respectively.  
doi:10.1371/journal.pone.0104933.g001

ship with any sampled species in the *GBSSI* tree (Figure 2), providing indirect evidence for the full divergence of B-type *GBSSI* homoeologues of *C. sorghoides* away from the maternal parent in *Sorghum* (clade II) in the *GBSSI* tree.

The paternal parent of *Cleistachne sorghoides* remains unresolved due to the incongruence between the two LCN trees. In the *Ppc4* tree, A-type homoeologue of *C. sorghoides* shared a common ancestor with clade P-I native to the Old World, while A-type *GBSSI* homoeologues of *C. sorghoides* showed a strong relationship with *Sorghastrum nutans* in the *GBSSI* tree. Considering its geographic range in North America, *Sorghastrum nutans* seems a much less likely candidate as the paternal parent

for *C. sorghoides* because geographically there is no opportunity for sexual contact with its potential maternal lineage.

To explain the paternal genome of *C. sorghoides*, it seems likely that *C. sorghoides* acquired the A-type *Ppc4* sequences via hybridization with the ancestor of subg. *Sorghum*, and subsequently the A-type *GBSSI* sequences of *C. sorghoides* experienced recombination (gene exchange) with species of the African-American disjunct *Sorghastrum* [11]. A pre-requisite of this hypothesis is that East Africa and India would have been the geographic location of the recombination episode, perhaps in the fallow lands of Sudan, Uganda, Kenya, Congo, and India, where the native distribution of *C. sorghoides* is found [11]. Therefore, the recombination event of *C. sorghoides* placed its *GBSSI*

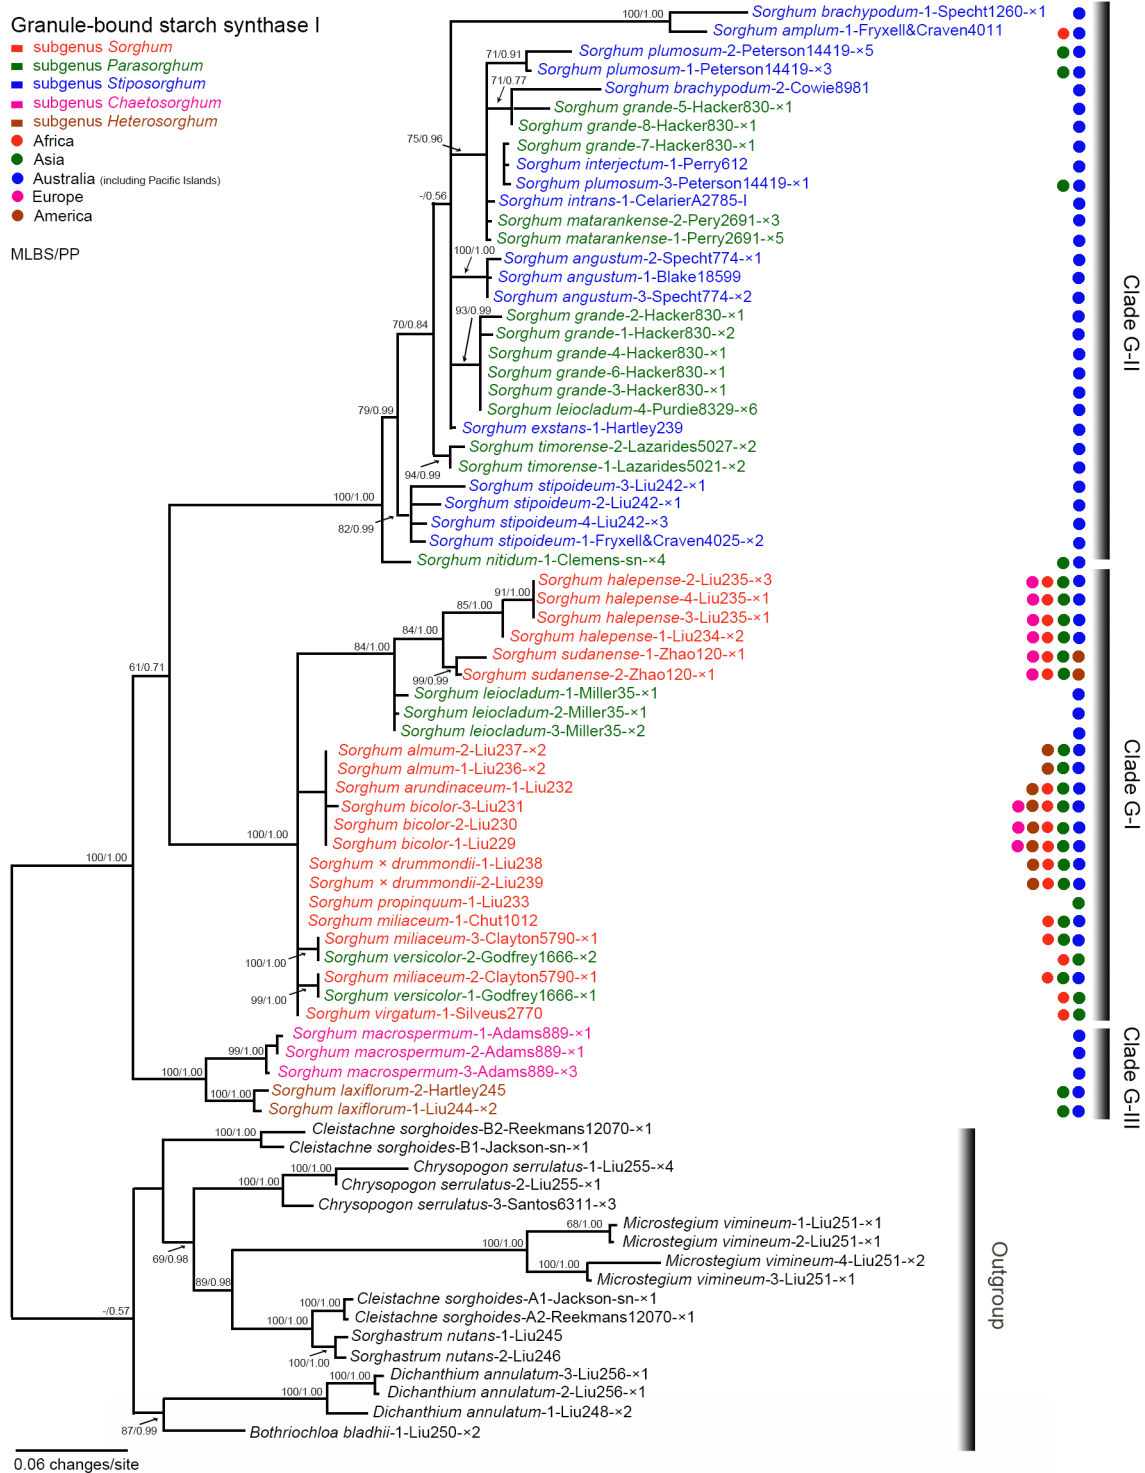

**Figure 2. Maximum likelihood phylogeny of *Sorghum* inferred from nuclear *GBSSI* data.** Numbers above branches are maximum likelihood bootstrap/Bayesian posterior probability (MLBS/PP). Taxon labels are in the format: *Sorghum matarankense*-2-Perry2691- $\times$ 3 where *Sorghum matarankense* indicates that the sequence belongs to the species *Sorghum matarankense*; -2 = the second sequence listed in Table S1 for the species; Perry2691 = specimen voucher information;  $\times$ 3 indicates we recovered 3 clones for the sequence; and without any mark after specimen voucher information indicates the sequence is derived from PCR-direct sequencing. Coloured taxon labels and circles correspond to the listed subgenera and geographic ranges at the top left corner of the figure, respectively.  
doi:10.1371/journal.pone.0104933.g002





**Table 4.** Posterior age distributions of lineages of interest in *Sorghum* plus *Cleistachne sorghoides*.

| Lineage                                                                             | N | Stem age (Mya)  | Crown age (Mya) |
|-------------------------------------------------------------------------------------|---|-----------------|-----------------|
| <i>Sorghum</i> plus <i>Cleistachne sorghoides</i>                                   | 1 | 14.3 (5.6–18.0) | 12.7 (5.5–16.7) |
| Clade II                                                                            | 2 | 12.7 (5.5–16.7) | 11.7 (5.0–14.2) |
| Clades I+III                                                                        | 3 | 12.7 (5.5–16.7) | 10.5 (4.1–14.1) |
| Clade II excluding <i>S. grande</i>                                                 | 4 | 11.7 (5.0–14.2) | 10.5 (4.1–13.8) |
| Clade II excluding <i>S. grande</i> and <i>Cleistachne sorghoides</i>               | 5 | 10.5 (4.1–13.8) | 9.0 (3.3–11.5)  |
| Clade I                                                                             | 6 | 10.5 (4.1–14.1) | 8.6 (3.0–11.1)  |
| Clade III                                                                           | 7 | 10.5 (4.1–14.1) | 8.2 (2.3–11.1)  |
| The <i>S. bicolor</i> - <i>S. sudanense</i> lineage (Africa, America, Asia, Europe) | 8 | 5.8 (1.5–6.6)   | 3.9 (0.3–4.3)   |
| The <i>S. bicolor</i> - <i>S. virgatum</i> lineage (Africa, Asia)                   | 9 | 3.9 (0.1–4.0)   | 2.4 (0.0–3.4)   |

Lineage number (N) correspond to Figure 3; Lineage age is given by the mean age and the 95% highest posterior density (HPD) intervals in brackets; The age of each lineage is composed of the stem and the crown ages.  
doi:10.1371/journal.pone.0104933.t004

supported by *GBSSI* data. The absence of a definitive boundary for members of the subtribe Sorghinae has led others to suggest that the subtribe might have experienced rapid radiation [41]. The gene recombination event was inferred to explain the *GBSSI* sequence divergence of *C. sorghoides* from *Sorghum*, thus the unresolved phylogenetic position of the B-type *GBSSI* homoeologues of *C. sorghoides* in the *GBSSI* tree may indicate a complex phylogenetic history of the Sorghinae.

Three infrageneric lineages were supported by the LCN and the plastid data: the subg. *Sorghum* lineage; the subg. *Parasorghum* and *Stiposorghum* lineage; and the subg. *Chaetosorghum* and *Heterosorghum* lineage. The subg. *Chaetosorghum* and *Heterosorghum* lineage contained *S. macrospermum* and *S. laxiflorum*, respectively (Figures 2 and 3). These two species were easily distinguished from the remaining Australian native species of *Sorghum* in having glabrous culm nodes, reduced pedicelled spikelets, and a minute obtuse callus [2,3]. The two species possessed relatively smaller 2C DNA content (2.07 pg to 2.49 pg) than the remaining congeneric Australian species [3,36,77,78]. The close relationship between *S. macrospermum* and *S. laxiflorum* was also supported by nrDNA ITS [8,10] and the combined ITS1/*ndhF*/*Adh1* [9,14]. On the basis of morphological, cytogenetic, and molecular sequence evidence, it is appropriate to recognize a distinct subg. *Chaetosorghum* comprising two sections: sect. *Chaetosorghum* (E.D. Garber) Ivanjuk. & Doronina (*S. macrospermum*) and sect. *Heterosorghum* (E.D. Garber) Ivanjuk. & Doronina (*S. laxiflorum*) (Table 5), although we could not get clean *Pepc4* sequences of *S. macrospermum* in the laboratory.

Most species of subg. *Parasorghum* and *Stiposorghum* were resolved into one well-supported lineage in the two LCN phylograms. The two subgenera were traditionally distinguished by length and shape of the callus on the sessile spikelet: *Parasorghum* was characterized by a short and blunt callus with an articulation joint, whereas *Stiposorghum* was characterized by a long and pointed callus with a linear joint [2,3]. However, doubts have recently been cast on the systematic value of the callus owing to the continuity of character states across the subgeneric boundary [14]. The subjective nature of determining callus morphology was also reflected by the molecular results because members of *Parasorghum* and *Stiposorghum* were aligned into a single lineage [7,8,40]. Since there were no well-defined taxonomic and genetic boundaries between these two subgenera,

the most practical solution is to combine them into a single subg. *Parasorghum* (Table 5).

Subgenus *Chaetosorghum* (including *S. macrospermum* and *S. laxiflorum*) appears closely related to subg. *Sorghum* with strong support (PP=1.00) in the plastid tree (Figure 3); and such a relationship is consistent with nrDNA ITS [8], the combined ITS1/*ndhF*/*Adh1* [14], and *Pepc4* sequence data (Figure 1). Although the relationship between subg. *Chaetosorghum* and the clade G-I+clade G-II lineage received weak support (MLBS=0.61, PP=0.71) in the *GBSSI* tree, the placement of subg. *Chaetosorghum* in *Sorghum* is unequivocally supported by the sequence data [79].

### Interspecific relationships within subg. *Sorghum* and GP-3 species

In the *Pepc4* phylogram, weak support (MPBS<50%, PP<0.5) was found for *S. bicolor* (Australian and Mexican accessions) and its immediate wild relatives, i.e., *S. alnum*, *S. arundinaceum*, *S. x drummondii*, *S. propinquum*, and *S. virgatum* (Figure 1). The five species formed a strongly supported clade G-I (Figure 2). Based on the short branch lengths within clade P-I and clade G-I, the ease to hybrid formation between *S. bicolor* and certain members of subg. *Sorghum* [80], and their similar karyotypes [81], it is reasonable to infer that the ancestors of *S. bicolor* may be members of subg. *Sorghum* [82]. It was suggested that *S. alnum* was a recent fertile hybrid between *S. bicolor* and *S. halepense* [80], but *S. arundinaceum*, *S. bicolor*, *S. x drummondii*, *S. propinquum*, and *S. virgatum* appear closely related to *S. alnum* in *Pepc4*, *GBSSI*, and plastid phylograms, suggesting that they may be potential genome donors to *S. alnum* [16].

*Sorghum bicolor* is an annual diploid species native to Africa [13]. Four main hypotheses have been proposed to explain its early evolutionary history: (1) annual *S. arundinaceum* was assumed to be the wild progenitor of *S. bicolor* based on a cytological study [11]; (2) *S. bicolor* was thought to be an interspecific hybrid and a descendant of two diploid species ( $2n=10$ ) [83]; (3) *S. bicolor* may have arisen by chromosome doubling from one diploid ancestor ( $2n=10$ ) [84]; or (4) *S. bicolor* may share a common ancestor with sugarcane and maize through an ancient polyploidization event [85]. The first hypothesis is supported by our study, where *S. arundinaceum* is confirmed to have a close relationship with *S. bicolor*, and this is seen in our LCN trees. Being an ancient forest-savanna species native to tropical Africa [86], *Sorghum arundinaceum* extends eastwards to

**Table 5.** A proposed new subgeneric classification of *Sorghum* Moench (subtribe Sorghinae Clayton & Renvoize, tribe Andropogoneae Dumort.) based on plastid and nuclear DNA data (\*not examined in this study).

|                                                                                                                                                                                                                                                                                                                                                                                                                                                                                                                                                                                                                                                                         |
|-------------------------------------------------------------------------------------------------------------------------------------------------------------------------------------------------------------------------------------------------------------------------------------------------------------------------------------------------------------------------------------------------------------------------------------------------------------------------------------------------------------------------------------------------------------------------------------------------------------------------------------------------------------------------|
| subg. <i>Chaetosorghum</i> E.D. Garber                                                                                                                                                                                                                                                                                                                                                                                                                                                                                                                                                                                                                                  |
| sect. <i>Chaetosorghum</i> (E.D. Garber) Ivanjuk. & Doronina                                                                                                                                                                                                                                                                                                                                                                                                                                                                                                                                                                                                            |
| <i>S. macrospermum</i> E.D. Garber                                                                                                                                                                                                                                                                                                                                                                                                                                                                                                                                                                                                                                      |
| sect. <i>Heterosorghum</i> (E.D. Garber) Ivanjuk. & Doronina                                                                                                                                                                                                                                                                                                                                                                                                                                                                                                                                                                                                            |
| <i>S. laxiflorum</i> F.M. Bailey                                                                                                                                                                                                                                                                                                                                                                                                                                                                                                                                                                                                                                        |
| subg. <i>Parasorghum</i> (Snowden) E.D. Garber [syn: subg. <i>Stiposorghum</i> E.D. Garber]                                                                                                                                                                                                                                                                                                                                                                                                                                                                                                                                                                             |
| <i>S. amplum</i> Lazarides, <i>S. angustum</i> S.T. Blake, <i>S. bulbosum</i> Lazarides, <i>S. brachypodium</i> Lazarides, <i>S. ecarinatum</i> Lazarides, <i>S. exstans</i> Lazarides, <i>S. grande</i> Lazarides, <i>S. interjectum</i> Lazarides, <i>S. intrans</i> F. Muell. ex Benth., <i>S. leiocladum</i> (Hack.) C.E. Hubb., <i>S. matarankense</i> E.D. Garber & L.A. Snyder, <i>S. nitidum</i> (Vahl) Pers., <i>S. plumosum</i> (R.Br.) P. Beauv., <i>S. purpureosericeum</i> (Hochst. ex A. Rich.) Asch. & Schweinf., <i>S. stipoideum</i> (Ewart & Jean White) C.A. Gardner & C.E. Hubb., <i>S. timorensis</i> (Kunth) Büse, <i>S. versicolor</i> Andersson |
| subg. <i>Sorghum</i>                                                                                                                                                                                                                                                                                                                                                                                                                                                                                                                                                                                                                                                    |
| <i>S. alnum</i> Parodi, <i>S. arundinaceum</i> (Desv.) Stapf, <i>S. bicolor</i> (L.) Moench, <i>S. x drummondii</i> (Nees ex Steud.) Millsp. & Chase, <i>S. halepense</i> (L.) Pers., <i>S. miliaceum</i> (Roxb.) Snowden, <i>S. propinquum</i> (Kunth) Hitchc., <i>S. sudanense</i> (Piper) Stapf, <i>S. virgatum</i> (Hack.) Stapf                                                                                                                                                                                                                                                                                                                                    |
| Incertae sedis                                                                                                                                                                                                                                                                                                                                                                                                                                                                                                                                                                                                                                                          |
| * <i>S. burmahicum</i> Raizada, * <i>S. controversum</i> (Steud.) Snowden, * <i>S. x derzhavinii</i> Tzvelev, <i>S. sorghoides</i> (Benth.) Q. Liu & P.M. Peterson, * <i>S. trichocladum</i> (Rupr. ex Hack.) Kuntze                                                                                                                                                                                                                                                                                                                                                                                                                                                    |

doi:10.1371/journal.pone.0104933.t005

India, Australia, and is introduced to tropical America [5,11]. It is possible that the cultivated sorghum originated from *S. arundinaceum* native to forest-savanna in the sub-Saharan belt at the north of the equator before it colonized regions from the Atlantic to the Indian Oceans.

The separation of *S. sudanense* (Sudan grass) from *S. x drummondii* is supported by our study. The two species are distributed from Sudan to Egypt in East Africa [13] and naturalized in China and the Americas [39]. The relationship between these two species was incongruent based on the two LCN gene phylograms. The *Pepc4* sequences suggest that *S. sudanense* is sister to the lineage containing *S. x drummondii* and the remainder of subg. *Sorghum* with strong support (MLBS = 100%, PP = 1.00, Figure 1), it appears that *S. sudanense* is genetically distant from *S. x drummondii*. While in the *GBSSI* phylogram, the two species are nested within a strongly supported clade G-I (MLBS = 100%, PP = 1.00, Figure 2). An interpretation of the incongruent pattern might be that *S. sudanense* was a consequence of sympatric speciation among different East African populations of *S. x drummondii* occurring abundant genetic variation [87]. *Sorghum sudanense* has obovate caryopses with smooth surfaces whereas *S. x drummondii* has obovate or elliptic caryopses with striate surfaces (H. Liu et al., unpublished data). Perhaps caryopses with different surface sculptures are the phenotypic consequence of adaptation to different microhabitats [88,89]. Recognition of the two taxa at the specific level, as opposed to merging them as varieties [13] is compatible with our results.

The genome origin of *S. halepense* has been debated for years. It was believed that *S. halepense* experienced homoeologous chromosome transpositions [90] from potential progenitors *S. bicolor* and *S. propinquum* [91,92]. Some workers proposed that *S. halepense* was a segmental allotetraploid hybrid between *S. arundinaceum* and *S. propinquum* [12,80]. If so, the maternal parents of *S. halepense* may have come from members of subg. *Sorghum*, since *S. halepense* is deeply nested within lineage number 6 (Figure 3). Furthermore, the plastid data supports *S. arundinaceum* and *S. x drummondii* as potential progenitors of *S. halepense*. An alternative hypothesis is that *S. halepense* is an interspecific hybrid and a descendant of *S. bicolor* and *S. virgatum*

[93]. However, the *Pepc4* and *GBSSI* data contradict this hypothesis since no corresponding loci were isolated from *S. halepense*. In *GBSSI* tree, four sequences of *S. halepense* formed a lineage (MLBS = 85%, PP = 1.00), which was sister to the *S. sudanense* lineage. These results are consistent with the hypothesis that *S. halepense* arose via homoeologous chromosome transpositions from members of subg. *Sorghum*. *Sorghum halepense* exhibits disomic inheritance [38,83], allowing the independent assortment of DNA segments between progenitors resulting in a complex evolutionary pattern [94]. This assumption is substantiated in allozyme studies, where high-frequency alleles found in *S. halepense* were not detected in *S. bicolor* or *S. propinquum*, providing further evidence for the absence of alleles from progenitors of *S. halepense* [95].

Based on *GBSSI* and plastid data, *Sorghum nitidum* is nested within the subg. *Parasorghum* and *Stiposorghum* lineage. *Sorghum nitidum* is distributed in southeast Asia, the Pacific Islands, and northern Australia [2], and exhibits significant morphological variation. The species is characterized by a hairy ring around the nodes, awnless or awned lemmas in sessile spikelets, and relatively small chromosomes [81]. Based on ITS and *ndhF* analyses, *S. nitidum* is embedded in subg. *Sorghum* [16]. However, the genome size of *S. nitidum* (2.20 pg) resembles that of members of subg. *Parasorghum* and *Stiposorghum* (0.64 pg–2.30 pg) rather than that of subg. *Sorghum* (0.26 pg–0.42 pg) [36]. Our study supports a close relationship between *S. nitidum* and the subg. *Parasorghum* and *Stiposorghum* lineage [2,9].

### Palaeoclimatic hypothesis for lineage divergence in *Sorghum*

It is recognized that the evolution of organisms is profoundly influenced by past tectonic activities and climate changes [30,96]. Two *Sorghum* major lineages (lineage numbers 2 and 3) diverged from a common ancestor at 12.7 (95% HPD: 5.5–16.7) Mya (Figure 3) in the middle Miocene-Pliocene interval marked by aridification, which induced C<sub>4</sub> grassland emergences in Africa [28,97]. The Eastern branch of East Africa Rift has continuously uplifted since the early Miocene [98,99], and the increasingly arid climate of tropical and subtropical Africa was caused by the topographic barrier of the eastern branch Rift to moist maritime

air from the Indian Ocean [100,101]. The resultant formation of new ecological niches [28] presumably catalyzed the diversification of *Sorghum* (e.g., lineage numbers 8 and 9 in Figure 3) in Africa at a time when significant faunal turnover was observed, e.g., leaf-mining flies [102], savanna-inhabiting crickets [103], prairie-adapted rodents [104], and grass-feeding mammals [105].

The northern Australian endemic species of *Sorghum* (mostly in lineage number 5, Figure 3) diverged by 9.0 (HPD: 3.3–11.5) Mya around the late Miocene/Pliocene boundary, when the monsoonal palaeoclimate was characterized by south-eastward dry trade winds in winter and north-westward moist flow in summer [106–108]. The Australian endemic species [e.g., *S. intrans*, *S. leiocladum*, *S. matarakense* E.D. Garber & L.A. Snyder, and *S. timorense* (Kunth) Büse] are geographically restricted to rocky hills, coastal dunes, and seasonally flooded swamps in northern Australia [3,5] where the local vegetation was affected by the lowering seas, leading to the dominance of monsoonal savannas [109]. Meanwhile, the highly dissected tropical areas became even more scattered in northern Australia causing complex topography in the monsoonal savannas. Therefore, it is reasonable to hypothesize that the dominance of monsoonal savanna in the late Miocene contributed to the high level of endemism of *Sorghum* in Australia.

### Taxonomy

Traditionally, *Cleistachne* has been separated from *Sorghum* because it has only single spikelets whose pedicels are thought to represent raceme peduncles, whereas *Sorghum* has sessile and pedicelled spikelets, although the sessile spikelets can be much reduced [6,11]. Our study and that of early workers agree that *Cleistachne* is allied with *Sorghum* [6,11,110]; we thus propose the new combination as below.

***Sorghum sorghoides*** (Benth.) Q. Liu & P.M. Peterson, **comb. nov.** Basionym: *Cleistachne sorghoides* Benth., Hooker's Icon. Pl. 14: t. 1379. 1882.

We also propose a new subgeneric classification of *Sorghum* (Table 5). Within *Sorghum* we recognized three subgenera: *Chaetosorghum*, *Parasorghum*, and *Sorghum*; and chose to retain two sections within *Chaetosorghum*: *Chaetosorghum* and *Heterosorghum*. Alternatively, based on our molecular results, one could use the new generic name *Sarga* to represent species in subg. *Parasorghum*, *Sorghum* for species in subg. *Sorghum*, *Vacoparis* for species in *Chaetosorghum* and retain *Cleistachne*. Perhaps with a greater number of molecular markers, the apparent hybrid origin of *S. sorghoides* and phylogenetic position of *S. burmahicum* Raizada, *S. controversum* (Steud.) Snowden, *S. derzhavini* Tzvelev, and *S. trichocladum* (Rupr. ex Hack.) Kuntze (all incertae sedis in our classification) will be elucidated.

### Conclusions

The monophyly of *Sorghum* plus *Cleistachne sorghoides* is supported by the *Pepc4* and the plastid data, and we provide a new combination, *Sorghum sorghoides*. Molecular results support the allotetraploid origin of *S. sorghoides*. Based on combined plastid data, members of subg. *Parasorghum* may represent the maternal parents, while the paternal parents of *S. sorghoides* remained unresolved because of incongruence between the *Pepc4* and the *GBSSI* phylograms. *Sorghum macrospermum* is sister to *S. laxiflorum*, forming a distinct clade, which we refer to as subg. *Chaetosorghum* with two sections *Chaetosorghum* (*S. macrospermum*) and *Heterosorghum* (*S. laxiflorum*). Most of members of the

two subgenera *Parasorghum* and *Stiposorghum* are resolved into one well-supported lineage by the two LCN phylograms. Therefore, we choose to recognize a single subg. *Parasorghum*, and place *Stiposorghum* in synonymy. The two LCN gene trees and the combined plastid tree are consistent with the hypothesis that *S. halepense* originated via homoeologous chromosome transpositions. During the middle Miocene-Pliocene interval, the formation of new ecological niches in tropical and subtropical Africa presumably catalysed the diversification of *Sorghum* in Africa. Furthermore, it seems reasonable to infer that the dominance of monsoonal savanna in the late Miocene contributed to the high level of endemism of *Sorghum* in Australia. Molecular results support the recognition of three distinct subgenera in *Sorghum*: subg. *Chaetosorghum* with two sections each containing a single species, subg. *Parasorghum* with 17 species, and subg. *Sorghum* with nine species.

### Supporting Information

**Figure S1 Results of the exploration of *Pepc4* MCMC convergence using the AWTY (Are We There Yet?) approach.** (a) Cumulative plot of the posterior probabilities of 20 splits at selected increments over one of two MCMC runs. (b) Comparative plot of posterior probabilities of all splits for paired MCMC runs. (TIF)

**Figure S2 Results of the exploration of *GBSSI* MCMC convergence using the AWTY (Are We There Yet?) approach.** (a) Cumulative plot of the posterior probabilities of 20 splits at selected increments over one of two MCMC runs. (b) Comparative plot of posterior probabilities of all splits for paired MCMC runs. (TIF)

**Figure S3 Results of the exploration of three plastid sequences (*ndhA* intron, *rpl32-trnL* and *rps16* intron) MCMC convergence using the AWTY (Are We There Yet?) approach.** (a) Cumulative plot of the posterior probabilities of 20 splits at selected increments over one of two MCMC runs. (b) Comparative plot of posterior probabilities of all splits for paired MCMC runs. (TIF)

**Table S1 Taxon name, chromosome number, source, and GenBank accession numbers of *Pepc4*, *GBSSI*, and three plastid (*ndhA* intron, *rpl32-trnL*, and *rps16* intron) sequences used in the study.** (DOCX)

### Acknowledgments

We thank ILRI-Addis Ababa, IS-Andhra Pradesh, and USDA-Beltsville Germplasm System for seeds, and six anonymous reviewers for their constructive comments that improved the manuscript.

### Author Contributions

Conceived and designed the experiments: QL PMP. Performed the experiments: QL HL. Analyzed the data: QL HL. Contributed reagents/materials/analysis tools: QL HL JW PMP. Contributed to the writing of the manuscript: QL HL JW PMP. Obtained necessary plant material: QL HL PMP.

## References

1. FAO (Food and Agriculture Organization of the United Nations) (2011) FAOSTAT Database. FAO, Rome, Italy. Available: <http://faostat.fao.org>. Accessed 30 September 2011.
2. Garber ED (1950) Cytotaxonomic studies in the genus *Sorghum*. *Univ Calif Publ Bot* 23: 283–361.
3. Lazarides M, Hacker JB, Andrew MH (1991) Taxonomy, cytology and ecology of indigenous Australian sorghums (*Sorghum* Moench: Andropogoneae: Poaceae). *Aust Syst Bot* 4: 591–635.
4. Clayton WD, Vorontsova MS, Harman KT, Williamson H (2006 onwards). GrassBase –The online world grass flora. Available: <http://www.kew.org/data/grasses-db.html>. Accessed 8 November 2006.
5. Liu H, Liu Q (2014) Geographical distribution of *Sorghum* Moench (Poaceae). *J Trop Subtrop Bot* 22: 1–11.
6. Clayton WD, Renvoize SA (1986) Genera graminum: grasses of the world. *Kew Bull Addit Ser* 13: 320–375.
7. Soreng RJ, Davids G, Peterson PM, Zuloaga FO, Judziewicz EJ, et al. (2014) A world-wide phylogenetic classification of Poaceae (Gramineae): 草 (草), capim, çayır, çimen, darba, ghaas, ghas, gish, gramas, graminus, gräser, grasses, gyokh, he-ben-ke, hullu, kasa, kusa, nyasi, pastos, pillu, pullu, zlakı, etc. Available: <http://www.tropicos.org/projectwebportal.aspx?pagename=ClassificationNWG&projectid=10>. Accessed 13 January 2014.
8. Dillon SL, Lawrence PK, Henry RJ (2001) The use of ribosomal ITS to determine phylogenetic relationships within *Sorghum*. *Plant Syst Evol* 230: 97–110.
9. Dillon SL, Lawrence PK, Henry RJ, Ross L, Price HJ, et al. (2004) *Sorghum laxiflorum* and *S. macrospermum*, the Australian native species most closely related to the cultivated *S. bicolor* based on ITS1 and *ndhF* sequence analysis of 25 *Sorghum* species. *Plant Syst Evol* 249: 233–246.
10. Sun Y, Skinner DZ, Liang GH, Hulbert SH (1994) Phylogenetic analysis of *Sorghum* and related taxa using internal transcribed spacers of nuclear ribosomal DNA. *Theor Appl Genet* 89: 26–32.
11. Clayton WD, Renvoize SA (1982) Gramineae (Part 3). In: Polhill RM, editor. *Flora of Tropical East Africa*. Rotterdam: August Aimé Balkema. pp. 320–734.
12. Celarier RP (1958) Cytotaxonomy of the Andropogoneae. III. Subtribe Sorghaeae, genus *Sorghum*. *Cytologia* 23: 395–418.
13. De Wet MJM (1978) Systematics and evolution of *Sorghum* sect. *Sorghum* (Gramineae). *Am J Bot* 65: 477–484.
14. Dillon SL, Lawrence PK, Henry RJ, Price HJ (2007) *Sorghum* resolved as a distinct genus based on combined ITS1, *ndhF* and *Adh1* analyses. *Plant Syst Evol* 268: 29–43.
15. Spangler RE (2003) Taxonomy of *Sarga*, *Sorghum* and *Vacouparis* (Poaceae: Andropogoneae). *Aust Syst Bot* 16: 279–299.
16. Ng'uni D, Geleta M, Fatih M, Bryngelsson T (2010) Phylogenetic analysis of the genus *Sorghum* based on combined sequence data from cpDNA regions and ITS generate well-supported trees with two major lineages. *Ann Bot* 105: 471–480.
17. Harlan JR, De Wet MJM (1971) Toward a rational classification of cultivated plants. *Taxon* 20: 509–517.
18. Stenhouse JW, Prasada Rao KE, Gopal Reddy V, Appa Pao KD (1997) *Sorghum*. In: Fuccillo D, Sears L, Stapleton P, editors. *Biodiversity in Trust: Conservation and Use of Plant Genetic Resources in CGIAR Centers*. Cambridge: Cambridge University Press. pp. 292–308.
19. Snowden JD (1955) The wild fodder sorghums of the section *Eu-sorghum*. *J Linn Soc Lond* 55: 191–260.
20. Knobloch IW (1968) A check list of crosses in the Gramineae. New York: Stechert-Hafner Service Agency.
21. Knobloch IW (1972) Intergeneric hybridization in flowering plants. *Taxon* 21: 97–103.
22. Ness RW, Graham SW, Barrett SCH (2011) Reconciling gene and genome duplication events: using multiple nuclear gene families to infer the phylogeny of the aquatic plant family Pontederiaceae. *Mol Biol Evol* 28: 3009–3018.
23. Zhang N, Zeng LP, Shan HY, Ma H (2012) Highly conserved low-copy nuclear genes as effective markers for phylogenetic analyses in angiosperms. *New Phytol* 195: 923–937.
24. Zimmer EA, Wen J (2012) Using nuclear gene data for plant phylogenetics: progress and prospects. *Mol Phylogenet Evol* 65: 774–785.
25. Liu Q, Triplett JK, Wen J, Peterson PM (2011) Allotetraploid origin and divergence in *Eleusine* (Chloridoideae, Poaceae): evidence from low-copy nuclear gene phylogenies and a plastid gene chronogram. *Ann Bot* 108: 1287–1298.
26. Cronn R, Wendel JF (2004) Cryptic trysts, genomic mergers, and plant speciation. *New Phytol* 161: 133–142.
27. Brassac J, Jakob SS, Blattner FR (2012) Progenitor-derivative relationships of *Hordeum* polyploids (Poaceae, Triticeae) inferred from sequences of *TOPO6*, a nuclear low-copy gene region. *PLoS ONE* 7: e33808.
28. Edwards EJ, Osborne CP, Strömberg CAE, Smith SA, C<sub>4</sub> Grasses Consortium (2010) The origins of C<sub>4</sub> grasslands: integrating evolutionary and ecosystem science. *Science* 328: 587–591.
29. Cerling TE, Harris JM, Macfadden BJ, Leakey MG, Quade J, et al. (1997) Global vegetation change through the Miocene/Pliocene boundary. *Nature* 389: 153–158.
30. Strömberg CAE (2005) Decoupled taxonomic radiation and ecological expansion of open-habitat grasses in the Cenozoic of North America. *Proc Natl Acad Sci USA* 102: 11980–11984.
31. Hartley W (1958) Studies on the origin, evolution, and distribution of the Gramineae. I. The tribe Andropogoneae. *Aust J Bot* 6: 116–128.
32. Keng YL (1939) The gross morphology of Andropogoneae. *Sinensia* 10: 274–343.
33. Liu Q, Peterson PM, Ge XJ (2011) Phylogenetic signals in the realized climate niches of Chinese grasses (Poaceae). *Plant Ecol* 212: 1733–1746.
34. Li N (2009) Cytology and seed biology of *Sorghum halepense* and its three related species. M.S. Thesis. Jinhua: Zhejiang Normal University.
35. Martin JH (1959) Sorghum and pearl millet. In: Hapbert H, Rudolf W, editors. *Handbuch der Pflanzenzüchtung*, 2nd edition, vol. 2. Berlin: Paul Parey. pp. 565–587.
36. Price HJ, Dillon SL, Hodnett G, Rooney WL, Ross L, et al. (2005) Genome evolution in the genus *Sorghum* (Poaceae). *Ann Bot* 95: 219–227.
37. De Wet MJM, Huckabay JP (1967) The origin of *Sorghum bicolor*. II. Distribution and domestication. *Evolution* 21: 787–802.
38. Reddi VR (1970) Chromosome association in one induced and five natural tetraploids of *Sorghum*. *Genetica* 41: 321–333.
39. Chen SL, Phillips SM (2006) *Sorghum* Moench. In: Wu ZY, Raven PH, editors. *Flora of China*, vol. 22. Beijing: Science Press and St. Louis: Missouri Botanical Garden Press. pp. 602–604.
40. Lu QS (2006) Sorghum. In: Dong YC, Liu X, editors. *Crops and Their Wild Relatives in China: Food Crops*. Beijing: China Agriculture Press. pp. 360–405.
41. Mathews S, Spangler RE, Mason-Gamer RJ, Kellogg EA (2002) Phylogeny of Andropogoneae inferred from phytochrome B, *GBSSI*, and *ndhF*. *Int J Plant Sci* 163: 441–450.
42. Spangler RE, Zaitchik B, Russo E, Kellogg EA (1999) Andropogoneae evolution and generic limits in *Sorghum* (Poaceae) using *ndhF* sequences. *Syst Bot* 24: 267–281.
43. Nadeem Ahsan SM, Vahidy AA, Ali SI (1994) Chromosome numbers and incidence of polyploidy in Panicoideae (Poaceae) from Pakistan. *Ann Mo Bot Gard* 81: 775–783.
44. Baltisberger M, Kocyan A (2010) IAPT/IOPB chromosome data 9. *Taxon* 59: 1298–1302.
45. Celarier RP (1956) Cytotaxonomy of the Andropogoneae. I. Subtribes Dimeriinae and Saccharinae. *Cytologia* 21: 272–291.
46. Vahidy AA, Davids A, Shigenobu Y (1987) Chromosome counts of Missouri Asteraceae and Poaceae. *Ann Mo Bot Gard* 74: 432–433.
47. Lepiniec L, Vidal J, Chollet R, Gadal P, Crétin C (1994) Phosphoenolpyruvate carboxylase: structure, regulation and evolution. *Plant Sci* 99: 111–124.
48. Mason-Gamer RJ, Weil CF, Kellogg EA (1998) Granule-bound starch synthase: structure, function, and phylogenetic utility. *Mol Biol Evol* 15: 1658–1673.
49. Christin PA, Besnard G, Samaritani E, Duval MR, Hodkinson TR, et al. (2008) Oligocene CO<sub>2</sub> decline promoted C<sub>4</sub> photosynthesis in grasses. *Curr Biol* 18: 37–43.
50. Mahelka V, Kopecký D (2010) Gene capture from across the grass family in the allohexaploid *Elymus repens* (L.) Gould (Poaceae, Triticeae) as evidenced by ITS, *GBSSI*, and molecular cytogenetics. *Mol Biol Evol* 27: 1370–1390.
51. Fortuné PM, Schierenbeck K, Ainouche A, Jacquemin J, Wendel JF, et al. (2007) Evolutionary dynamics of *Waxy* and the origin of hexaploid *Spartina* species. *Mol Phylogenet Evol* 43: 1040–1055.
52. Paterson AH, Bowers JE, Bruggmann R, Dubchak I, Grimwood J, et al. (2009) The *Sorghum bicolor* genome and the diversification of grasses. *Nature* 457: 551–556.
53. Shaw J, Lickey EB, Schilling EE, Small RL (2007) Comparison of whole chloroplast genome sequences to choose noncoding regions for phylogenetic studies in Angiosperms: the tortoise and the hare III. *Am J Bot* 94: 275–288.
54. Peterson PM, Romaschenko K, Johnson G (2010) A classification of the Chloridoideae (Poaceae) based on multi-gene phylogenetic trees. *Mol Phylogenet Evol* 55: 580–598.
55. Hiraishi A, Kamagata Y, Nakamura K (1995) Polymerase chain reaction amplification and restriction fragment length polymorphism analysis of 16S rRNA genes from methanogens. *J Ferment Bioeng* 79: 523–529.
56. Li FW, Pryer KM, Windham MD (2012) *Gaga*, a new fern genus segregated from *Cheilanthes* (Pteridaceae). *Syst Bot* 37: 845–860.
57. Rothfels CJ, Schuettpelz E (2013) Accelerated rate of molecular evolution for vittarioid ferns is strong and not driven by selection. *Syst Biol* 63: 31–54.
58. Edgar RC (2004) MUSCLE: multiple sequence alignment with high accuracy and high throughput. *Nucleic Acids Res* 32: 1792–1797.
59. Swofford DL (2003) PAUP\*. Phylogenetic analysis using parsimony (\* and other methods), ver. 4.0b10. Sunderland: Sinauer Associates.
60. Grusz AL, Windham MD, Pryer KM (2009) Deciphering the origins of apomictic polyploids in the *Cheilanthes yavapensis* complex (Pteridaceae). *Am J Bot* 96: 1636–1645.

61. Zwickl DJ (2006). Genetic algorithm approaches for the phylogenetic analysis of large biological sequence datasets under the maximum likelihood criterion. Ph.D. Thesis. Austin: University of Texas at Austin.
62. Ronquist F, Teslenko M, van der Mark P, Ayres DL, Darling A, et al. (2012) MrBayes 3.2: efficient Bayesian phylogenetic inference and model choice across a large model space. *Syst Biol* 61: 539–542.
63. Posada D, Crandall KA (1998) Modeltest: testing the model of DNA substitution. *Bioinformatics* 14: 817–818.
64. Nylander JAA, Wilgenbusch JC, Warren DL, Swofford DL (2008) AWTY (are we there yet?): a system for graphical exploration of MCMC convergence in Bayesian phylogenetics. *Bioinformatics* 24: 581–583.
65. Rota-Stabelli O, Telford MJ (2008) A multi criterion approach for the selection of optimal outgroups in phylogeny: recovering some support for Mandibulata over Myriochelata using mitogenomics. *Mol Phylogenet Evol* 48: 103–111.
66. Felsenstein J (1981) Evolutionary trees from DNA sequences: a maximum likelihood approach. *J Mol Evol* 17: 368–376.
67. Drummond AJ, Rambaut A (2007) BEAST: Bayesian evolutionary analysis by sampling trees. *BMC Evol Biol* 7: 214.
68. Vicentini A, Barber JC, Alicioni SS, Giussani LM, Kellogg EA (2008) The age of the grasses and clusters of origins of C<sub>4</sub> photosynthesis. *Glob Change Biol* 14: 2963–2977.
69. Nambudiri EMV, Tidwell WD, Smith BN, Hebbert NP (1978) A C<sub>4</sub> plant from the Pliocene. *Nature* 276: 816–817.
70. Jacobs BF, Kingston JD, Jacobs LL (1999) The origin of grass-dominated ecosystems. *Ann Mo Bot Gard* 86: 590–643.
71. Kellogg EA (2000) Molecular and morphological evolution in the Andropogoneae. In: Jacobs SWL, Everett J, editors. *Grasses: Systematics and Evolution*. Collingwood: Commonwealth Scientific and Industrial Research Organization Publishing, pp. 149–158.
72. Whistler DP, Burbank DW (1992) Miocene biostratigraphy and biochronology of the Dove Spring Formation, Mojave Desert, California, and characterization of the Clarendonian mammal age (late Miocene) in California. *Geol Soc Am Bull* 104: 644–658.
73. Ho SYW, Phillips MJ (2009) Accounting for calibration uncertainty in phylogenetic estimation of evolutionary divergence times. *Syst Biol* 58: 367–380.
74. Gelman A, Rubin DB (1992) Inference from iterative simulation using multiple sequences. *Statist Sci* 7: 457–511.
75. Hata S, Izui K, Kouchi H (1998) Expression of a soybean nodule-enhanced phosphoenolpyruvate carboxylase gene that shows striking similarity to another gene for a house-keeping isofom. *Plant J* 13: 267–273.
76. Duvall MR, Doebley JF (1990) Restriction site variation in the chloroplast genome of *Sorghum* (Poaceae). *Syst Bot* 15: 472–480.
77. Wu TP (1990) *Sorghum macrospermum* and its relationship to the cultivated species *S. bicolor*. *Cytologia (Tokyo)* 55: 141–151.
78. Wu TP (1993) Cytological and morphological relationships between *Sorghum laxiflorum* and *S. bicolor*. *J Hered* 84: 484–489.
79. Liao F, Liu Y, Yang XL, Huang GM, Niu CJ (2009) Molecular phylogenetic relationships among species in the genus *Sorghum* based on partial *Adh1* gene. *Hereditas* 31: 523–530.
80. Doggett J (1970) *Sorghum*. Longmans: Green and Company.
81. Gu MH, Ma HT, Liang GH (1984) Karyotype analysis of seven species in the genus *Sorghum*. *J Hered* 75: 196–202.
82. Van Oosterhout SAM (1992) The biosystems and ethnobotany of *Sorghum bicolor* in Zimbabwe. Ph.D. Thesis. Harare: University of Zimbabwe.
83. Tang H, Liang GH (1988) The genomic relationship between cultivated sorghum [*Sorghum bicolor* (L.) Moench] and Johnsongrass [*S. halepense* (L.) Pers.]: a re-evaluation. *Theor Appl Genet* 76: 277–284.
84. Swigoňová Z, Lai JS, Ma JX, Ramakrishna W, Llaca V, et al. (2004) Close split of sorghum and maize genome progenitors. *Genome Res* 14: 1916–1923.
85. Paterson AH, Bowers JE, Chapman BA (2004) Ancient polyploidization predating divergence of the cereals, and its consequences for comparative genomics. *Proc Natl Acad Sci USA* 26: 9903–9908.
86. House LR (1985) A guide to sorghum breeding. Andhra Pradesh: International Crops Research Institute for the Semi-Arid Tropics.
87. Bolnick DI, Fitzpatrick BM (2007) Sympatric speciation: models and empirical evidence. *Annu Rev Ecol Evol Syst* 38: 459–487.
88. Jiang B, Peterson P M, Liu Q (2011) Caryopsis micromorphology of *Eleusine Gaertn.* (Poaceae) and its systematic implications. *J Trop Subtrop Bot* 19: 195–204.
89. Zhang Y, Hu XY, Liu YX, Liu Q (2014). Caryopsis micromorphological survey of *Themeda* (Poaceae) and allied spathaceous genera in the Andropogoneae. *Turk J Bot* 38: 1206–1212.
90. Udall JA, Quijada PA, Osborn TC (2005) Detection of chromosomal rearrangements derived from homologous recombination in four mapping populations of *Brassica napus* L. *Genetics* 169: 967–979.
91. Doggett H (1976) *Sorghum*. In: Simmonds NW, editor. *Evolution of Crop Plants*. London: Longman Scientific and Technical, 112–117.
92. Paterson AH, Schertz KF, Lin YR, Liu C, Chang YL (1995) The weediness of wild plants: molecular analysis of genes influencing dispersal and persistence of Johnsongrass, *Sorghum halepense* (L.) Pers. *Proc Natl Acad Sci USA* 92: pp. 6127–6131.
93. Bhatti AG, Endrizzi JE, Reeves RG (1960) Origin of Johnsongrass. *J Hered* 51: 107–110.
94. Gaut BS, Doebley JF (1997) DNA sequence evidence for the segmental allotetraploid origin of maize. *Proc Natl Acad Sci USA* 94: 6809–6814.
95. Morden CW, Doebley J, Schertz KF (1990) Allozyme variation among the spontaneous species of *Sorghum* section *Sorghum* (Poaceae). *Theor Appl Genet* 80: 296–304.
96. Linder HP, Rudall PJ (2005) Evolutionary history of Poales. *Annu Rev Ecol Evol Syst* 36: 107–124.
97. Zachos J, Pagani M, Sloan L, Thomas E, Billups K (2001) Trends, rhythms, and aberrations in global climate 65 Ma to present. *Science* 292: 686–693.
98. Guiraud R, Bosworth W, Thierry J, Delaplanque A (2005) Phanerozoic geological evolution of Northern and Central Africa: an overview. *J Afr Earth Sci* 43: 83–143.
99. Lærdal T, Talbot MR (2002) Basin neotectonics of Lakes Edward and George, East African Rift. *Palaeogeogr Palaeoclimatol Palaeoecol* 187: 213–232.
100. Sepulchre P, Ramstein G, Fluteau F, Schuster M, Tiercelin JJ, et al. (2006) Tectonic uplift and East Africa aridification. *Science* 313: 1419–1423.
101. Swezey CS (2009) Cenozoic stratigraphy of the Sahara, Northern Africa. *J Afr Earth Sci* 53: 89–121.
102. Winkler IS, Mitter C, Scheffer SJ (2009) Repeated climate-linked host shifts have promoted diversification in a temperate clade of leaf-mining flies. *Proc Natl Acad Sci USA* 106: 18103–18108.
103. Vojte KL, Hemp C, Flagstad Ø, Saetre GP, Stenseth NC (2009) Climatic change as an engine for speciation in flightless Orthoptera species inhabiting African mountains. *Mol Ecol* 18: 93–108.
104. Finarelli J, Badgley C (2010) Diversity dynamics of Miocene mammals in relation to the history of tectonism and climate. *Proc R Soc Lond B Biol Sci* 277: 2721–2726.
105. Janis CM, Damuth J, Theodor JM (2000) Miocene ungulates and terrestrial primary productivity: where have all the browsers gone? *Proc Natl Acad Sci USA* 97: 7899–7904.
106. Wheeler MC, McBride JL (2005) Australian-Indonesian monsoon. In: Lau WKM, Waliser DE, editors. *Intraseasonal Variability in the Atmosphere-Ocean Climate System*. Heidelberg: Springer-Praxis, pp. 125–173.
107. Martin HA (2006) Cenozoic climatic change and the development of the arid vegetation in Australia. *J Arid Environ* 66: 533–563.
108. Russell-Smith J, Needham S, Brock J (1995) The physical environment. In: Press T, Lea D, Webb A, Graham A, editors. *Kakadu: Natural and Cultural Heritage Management*. Darwin: Australian Nature Conservation Agency, pp. 94–126.
109. Fujita MK, McGuire JA, Donnellan SC, Moritz C (2010) Diversification and persistence at the arid-monsoonal interface: Australia-wide biogeography of the Bynoe's gecko (*Heteronotia binoei*; Gekkonidae). *Evolution* 64: 2293–2314.
110. Phillips S (1995) Poaceae (Gramineae). In: Hedberg I, Edwards S, editors. *Flora of Ethiopia and Eritrea*. Addis Ababa: Addis Ababa University and Uppsala: Uppsala University.
